# Supplementary material
Source: bioRxiv or medRxiv preprint supplement (https://medrxiv.org/highwire/filestream/89410/field_highwire_adjunct_files/2/2020.07.12.20151696-3.pdf)
Supplement: Supplementary file [file 2020.07.12.20151696-3.pdf]

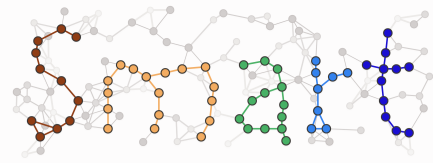

Please write carefully and, where appropriate, mark boxes with an 'X'

### About You

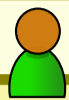

1 What is your school grade?

 

2 What is your school ID code?

       

Write one letter or number in each box, like this **1234**

3 How old are you?

I am   years old

4 Are you a boy or a girl?

a boy  a girl

Put an X in one box, like this

### About your family and home

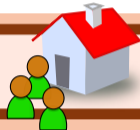

5 Not counting you, how many people live in your home?

people

6 Does any other person sleep in your bedroom?

No  Yes

7 If yes, how many people sleep in your bedroom, not counting you?

people

7 Does anyone in your house go to pre-school or day care?

No  Yes

If yes, how many people go to pre-school or day care?

people

8 Does anyone in your house go to elementary school (grades K to 6)?

No  Yes

If yes, how many people?

people

9 Does anyone in your house go to middle school (grades 7 or 8)?

*Do not count yourself*

No  Yes

If yes, how many people?

people

10 Does anyone in your house go to high school (grades 9 to 12)?

*Do not count yourself*

No  Yes

If yes, how many people?

people

11 What is the zipcode of your home address?

### About where you go

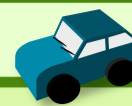

12 Where is the furthest place from your home you went in the past 7 days?

|              |                      |
|--------------|----------------------|
| City or town | <input type="text"/> |
| County       | <input type="text"/> |
| State        | <input type="text"/> |
| Country      | <input type="text"/> |

13 Where is the furthest place from your home you went in the past 30 days?

|              |                      |
|--------------|----------------------|
| City or town | <input type="text"/> |
| County       | <input type="text"/> |
| State        | <input type="text"/> |
| Country      | <input type="text"/> |

### About feeling sick and staying away from school

Sometimes when we are sick, we don't go to school. These questions are about the last time you were sick **and** didn't go to school.

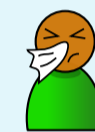

14 When you missed school, did you stay at your home?

No  Yes

15 When you missed school, who took care of you?

No-one  Your Mom or Dad

A brother or sister, or someone else you live with  Someone who doesn't live with you

Don't know

16 Did you get a flu vaccination this school year?

No  Yes  Don't know

17 Do you believe flu vaccines protect you against the flu?

No  Yes  Don't know

### About YESTERDAY

The rest of this questionnaire asks about your day YESTERDAY. If you can't remember what you did yesterday, ask your teacher for help.

18 Did you attend school YESTERDAY?

No  Yes

19 If you missed school, why was this?

I was sick or ill

School was closed

Some other reason

20 How did you get to school YESTERDAY?

walked or biked  public bus

by car  some other way

school bus  didn't go to school

# Your contact diary

This page asks you about the people you met yesterday

- people you talked with
- people you played with
- people you touched with your hands or face

## Steps to follow

- In **SECTION A** write down the name or nick-name for everyone you met **yesterday**. For example, "mom", "Derek", "my best friend", "mailman". **Don't write more than one person's name in each box.**
- Answer questions **21** to **32** for each of your contacts.
- Ask your teacher for your **two random numbers**. Write these in the spaces at the top of questions **33** and **34**. **These numbers refer to two of your contacts.** Answer questions **33** and **34** for all of your contacts.

## Do include:

- ✓ children and teachers you spoke to at school
- ✓ children or adults you to outside of school
- ✓ people whose skin you touched (e.g. while playing games)
- ✓ anyone you briefly spoke with on the way home from school

## Do not include:

- ✗ people you did not talk to
- ✗ people you only talked with through a telephone or computer
- ✗ pets or toys
- ✗ someone you walked past, but did not speak to or touch their skin
- ✗ people you did not meet yesterday

Put your ID sticker in this box

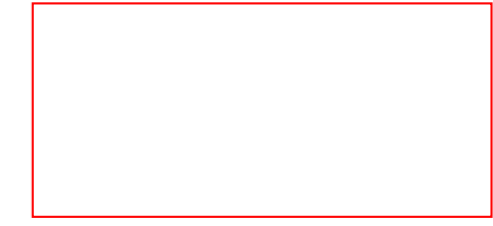

START HERE

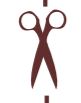

## SECTION A

**Your contacts**  
Write the name or a description of each person you met yesterday

|    |  |
|----|--|
| 1  |  |
| 2  |  |
| 3  |  |
| 4  |  |
| 5  |  |
| 6  |  |
| 7  |  |
| 8  |  |
| 9  |  |
| 10 |  |
| 11 |  |
| 12 |  |
| 13 |  |
| 14 |  |
| 15 |  |
| 16 |  |
| 17 |  |
| 18 |  |
| 19 |  |
| 20 |  |
| 21 |  |
| 22 |  |
| 23 |  |
| 24 |  |
| 25 |  |
| 26 |  |
| 27 |  |
| 28 |  |
| 29 |  |
| 30 |  |

|                                                                | 21 | 22 | 23 | 24 | 25 | 26 | 27 | 28 | 29 | 30 | 31 | 32 | 33 | 34 |
|----------------------------------------------------------------|----|----|----|----|----|----|----|----|----|----|----|----|----|----|
| a boy or man                                                   |    |    |    |    |    |    |    |    |    |    |    |    |    |    |
| a girl or woman                                                |    |    |    |    |    |    |    |    |    |    |    |    |    |    |
| Is this person ... ?                                           |    |    |    |    |    |    |    |    |    |    |    |    |    |    |
| How old is this person? Enter their age, or your best guess    |    |    |    |    |    |    |    |    |    |    |    |    |    |    |
| Does this person go to school?                                 |    |    |    |    |    |    |    |    |    |    |    |    |    |    |
| What grade are they? e.g. K, 7, 12                             |    |    |    |    |    |    |    |    |    |    |    |    |    |    |
| If they go to school ...                                       |    |    |    |    |    |    |    |    |    |    |    |    |    |    |
| Do you live with this person?                                  |    |    |    |    |    |    |    |    |    |    |    |    |    |    |
| Where did you meet yesterday?                                  |    |    |    |    |    |    |    |    |    |    |    |    |    |    |
| Did you touch their skin?                                      |    |    |    |    |    |    |    |    |    |    |    |    |    |    |
| Did you both hold the same toy or object at all yesterday?     |    |    |    |    |    |    |    |    |    |    |    |    |    |    |
| How long did you spend together during the whole of yesterday? |    |    |    |    |    |    |    |    |    |    |    |    |    |    |
| How often do you normally see this person?                     |    |    |    |    |    |    |    |    |    |    |    |    |    |    |
| Deliberately blank                                             |    |    |    |    |    |    |    |    |    |    |    |    |    |    |
| Did this person meet contact number yesterday?                 |    |    |    |    |    |    |    |    |    |    |    |    |    |    |
| Did this person meet contact number yesterday?                 |    |    |    |    |    |    |    |    |    |    |    |    |    |    |

Write your 1st random number here

Write your 2nd random number here

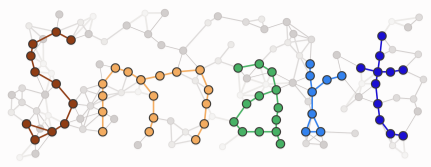

**35** Did you meet any more people yesterday that you haven't told us about?

No  Yes

**36** If yes, how many more people did you meet yesterday?

*Write how many in the boxes*

Babies and infants  
(0-4 years old)

Children  
(5-18 years old)

Grown-ups  
(19 or older)

**37** Did you meet more or less people yesterday than normal?

Less

About the same

More

**38** How easy did you find this questionnaire?

Very easy

Easy

Hard

Very hard

Don't know

**39** What was hard about it?

*Please write in the box below.*

When you have finished and checked your form:

- tear off and keep **SECTION A** from your contact diary page
- make sure you have put your ID stickers in the boxes on all three pages
- hand all the pages back to your teacher
